# Supplementary material for: Chlorine tailored CdOxCly/Al2O3 for syngas formation in electrochemical CO2 reduction
Source: Royal Society of Chemistry journal article supplement (doi:10.1039/d4cy01426j), 2025-01-01
Supplement: d4cy01426j1.pdf [file d4cy01426j1.pdf]

## *Supporting information*

### **Chlorine tailored CdO<sub>x</sub>Cl<sub>y</sub>/Al<sub>2</sub>O<sub>3</sub> for syngas in electrochemical CO<sub>2</sub> reduction**

Xin Wang,<sup>a</sup> Zhen-Hong He,<sup>a,\*</sup> Hui-Hui Cao,<sup>a</sup> Yu-Xuan Ji,<sup>a</sup> Xuan-Lu Fan,<sup>a</sup> Rui-Peng Yan,<sup>a</sup> Kuan

Wang,<sup>a</sup> Weitao Wang,<sup>a</sup> Lu Li,<sup>c,d</sup> Zhao-Tie Liu<sup>a,b,\*</sup>

<sup>a</sup>Shaanxi Key Laboratory of Chemical Additives for Industry, College of Chemistry and Chemical Engineering, Shaanxi University of Science and Technology, Xi'an 710021, China

<sup>b</sup>School of Chemistry & Chemical Engineering, Shaanxi Normal University, Xi'an 710119, China

<sup>c</sup>Key Laboratory of Auxiliary Chemistry and Technology for Chemical Industry, Ministry of Education, Shaanxi University of Science and Technology, Xi'an 710021, China

<sup>d</sup>Shaanxi Collaborative Innovation Center of Industrial Auxiliary Chemistry and Technology, Shaanxi University of Science and Technology, Xi'an 710021, China

\*Corresponding authors: hezhenhong@sust.edu.cn (Zhen-Hong He); ztliu@snnu.edu.cn (Zhao-Tie Liu)

## Materials

Aluminum nitrate ( $\text{Al}(\text{NO}_3)_3 \cdot 9\text{H}_2\text{O}$ , 99.0%, Shanghai Aladdin Biochemical Technology Co., LTD.), urea (99%, Shanghai Aladdin Biochemical Technology Co., LTD.), chromium chloride semi-pentahydrate ( $\text{CrCl}_2 \cdot 5/2\text{H}_2\text{O}$ , 99.0%, Shanghai Aladdin Biochemical Technology Co., LTD.), potassium bicarbonate ( $\text{KHCO}_3$ , analytically pure, Tianjin Kemie Ou Chemical Reagent Co., LTD.), Toray carbon paper (CP, YLS-30T,  $1\text{ cm} \times 1\text{ cm}$ ), and isopropyl alcohol (Analytically pure, Tianjin Kemie Ou Chemical Reagent Co., LTD.) are purchased from commercial sources. KSCN (>98.5%) was obtained from Greagent. Nafion perfluorinated resin, D520 (5 wt% in mixture of lower aliphatic alcohols and water) was provided by Shanghai Adamas Reagent Co., Ltd.

## Electrochemical measurements

The electrochemical measurements were performed in an H-type cell by using a three-electrode system including working electrode, reference electrode (3 mol/L Ag/AgCl), and Pt mesh auxiliary electrode, respectively. The catalytic performances were evaluated on an electrochemical workstation (CHI660E, Shanghai Chenhua Co., Ltd). The working electrode was prepared by immobilization of the electrocatalyst on carbon paper ( $1 \times 1\text{ cm}^2$ ). Typically, electrocatalyst (5 mg), isopropanol (600  $\mu\text{L}$ ), and Nafion solution (45  $\mu\text{L}$  5 wt%) were dispersed in the mixed under ultrasonication at room temperature for 30 min to obtain a uniform ink solution. Then, the catalyst ink (50  $\mu\text{L}$ ) was uniformly dripped onto a carbon paper ( $1 \times 1\text{ cm}^2$ ) to act as the working electrode. The potentials reported are all converted into reversible hydrogen electrode (RHE) via the following equation.

$$E (\text{vs. RHE}) = E (\text{vs. Ag/AgCl}) + 0.197 + 0.059 \times \text{pH} \quad (1)$$

Before the test, the cathode cell was treated by Ar or  $\text{CO}_2$  gas for 30 min, and then the LSV test

was carried out in the potential range from 0.62 ~ -1.38 V (vs. RHE) at a scanning rate of 50 mV·s<sup>-1</sup>.

Ag/AgCl (3 M KCl) was used as the reference electrode.

The reaction gas was analyzed by GC (GC9790II, Zhejiang Fuli Analytical Instrument Co., Ltd), and the electrolyte after reaction was tested by <sup>1</sup>H NMR (Bruker Avance III 400 HD spectrometer).

## **Catalyst characterization**

SEM images of the catalysts were recorded on SU8100.

TEM images of the catalysts were tested on FEI Tecnai G2 F20.

The XPS spectra were recorded on AXIS SUPRA using Al K $\alpha$  radiations. All the binding energies were calibrated with the C 1s line at 284.8 eV.

XRD patterns were conducted on a Rigaku D/max 2500 with nickel filtered Cu K $\alpha$  ( $\lambda = 0.154$  nm) at 40 kV and 20 mA in the range from 5° to 80°.

N<sub>2</sub> adsorption/desorption and CO<sub>2</sub> adsorption experiments were tested on ASAP 2460 (Micromeritics, USA). Prior to the tests, 120 mg samples were degassed under vacuum of 10<sup>-5</sup> torr at 150 °C for 12 h. The surface area of the samples was obtained according to Brunauer-Emmett-Teller (BET) method by analyzing the relative pressures (P/P<sub>0</sub>) in the range from 0.05 to 0.3.

The Fourier-transform Infrared (FT-IR, Invenio) spectra were used to test the structural changes of functional groups of catalysts in the range of 500-4000 cm<sup>-1</sup>.

## ***Tables***

**Table S1** Summary of reported catalysts in electrocatalytic reduction of CO<sub>2</sub> to syngas

| Entry | Catalyst                                                         | Electrolyte                                                          | E (vs. RHE) (V)                      | <i>j</i> (mA/cm <sup>2</sup> ) | Total FE values (%) | H <sub>2</sub> /CO ratio | Ref.      |
|-------|------------------------------------------------------------------|----------------------------------------------------------------------|--------------------------------------|--------------------------------|---------------------|--------------------------|-----------|
| 1     | Ag-P@HCS                                                         | 0.5 M KHCO <sub>3</sub>                                              | -0.7 ~ -1.1                          | -3 ~ -15                       | 92 ~ 102            | 0.92 ~ 0.39              | 1         |
| 2     | 3D hp CuAg                                                       | 0.1 M KHCO <sub>3</sub>                                              | -0.6 ~ -1.0                          | -2 ~ -12                       | 55 ~ 90             | 3:1 ~ 1:2                | 2         |
| 3     | Te-Pd NP/C                                                       | 0.1 M KHCO <sub>3</sub>                                              | -0.6 ~ -1.0                          | -15 ~ -34                      | 92 ~ 99             | 0.19 ~ 3.70              | 3         |
| 4     | Br-Ag(OR)                                                        | 2 M NH <sub>4</sub> HCO <sub>3</sub>                                 | -0.5 ~ -1.1                          | -5 ~ -110                      | 100                 | 0.30 ~ 3.35              | 4         |
| 5     | R-Cu <sub>3</sub> P/Cu                                           | 0.5 M NaHCO <sub>3</sub>                                             | -0.21 ~ -1.10                        | -82.9 ~ -115                   | 95 ~ 99             | 1:0.1 ~ 1:2.24           | 5         |
| 6     | F-Cu <sub>2</sub> O@ZIF-8                                        | 0.1 M KHCO <sub>3</sub>                                              | -0.7 ~ -1.1                          | -2 ~ -14                       | 75 ~ 95             | 2:1                      | 6         |
| 7     | CuFe <sub>2</sub> @NG                                            | 1 M KHCO <sub>3</sub>                                                | -0.51                                | -4.8                           | 96                  | FE <sub>CO</sub> 98%     | 7         |
| 8     | 4.3Pd-SnO <sub>2</sub>                                           | 0.5 M KHCO <sub>3</sub>                                              | -0.5 ~ -1.1                          | -5 ~ -45                       | 100                 | 0.28 ~ 4.2               | 8         |
| 9     | Fe-poN-C/Fe                                                      | 0.5 M KHCO <sub>3</sub>                                              | -0.24                                | -9                             | 99                  | FE <sub>CO</sub> : 99%   | 9         |
| 10    | Fe <sub>x</sub> C@CNT/N-MXene                                    | 0.1 M KCl                                                            | -0.8 ~ -1.2                          | 15-34                          | 95 ~ 104            | 0.22 ~ 2.82              | 10        |
| 11    | 1D/3D NPC-1000                                                   | 0.5 M KHCO <sub>3</sub>                                              | -0.35 ~ -0.75                        | 7.5-12.5                       | 38 ~ 98             | 0.20 ~ 1.28              | 11        |
| 12    | Co-NHCS-400                                                      | 0.5 M KHCO <sub>3</sub>                                              | -0.6 ~ -1.1                          | -2 ~ -11                       | 100                 | 1.75 ~ 2.22              | 12        |
| 13    | Cdhy-QS                                                          | 0.5 M [Bmim]PF <sub>6</sub> /MeCN                                    | -2.3 ~ -2.6                          | -200                           | 100                 | FE <sub>CO</sub> : 100%  | 13        |
| 14    | Cd/Cd(OH) <sub>2</sub> /CP                                       | [Bmim]PF <sub>6</sub> -65wt%CH <sub>3</sub> CN-5 wt%                 | -2.0(vs. Ag/Ag <sup>+</sup> )        | 23.8                           | 100                 | FE <sub>CO</sub> : 98.3% | 14        |
| 15    | Cd-PCN-222HTs                                                    | [Bmim]PF <sub>6</sub> (30 wt%)-H <sub>2</sub> O (5wt%)-MeCN (65 wt%) | -2.0 ~ -2.4(vs. Ag/Ag <sup>+</sup> ) | 68.0                           | 100                 | FE <sub>CO</sub> > 80%   | 15        |
| 16    | CdO <sub>x</sub> Cl <sub>y</sub> /Al <sub>2</sub> O <sub>3</sub> | 0.5 M KHCO <sub>3</sub>                                              | -1.0 ~ -1.4                          | 5.8~59.0                       | 96 ~ 108            | 0.3-3.1                  | This work |
| 17    | CdO <sub>x</sub> Cl <sub>y</sub> /Al <sub>2</sub> O <sub>3</sub> | 0.5 M KHCO <sub>3</sub>                                              | -1.4                                 | 59.0                           | 99                  | 3.1                      | This work |

**Table S2.** The analysis results of N<sub>2</sub> adsorption/desorption isotherms of samples

| <b>Catalysts</b>                                                       | <b>BET surface area<br/>(m<sup>2</sup>/g)</b> | <b>Pore size<br/>(nm)</b> | <b>Pore volume<br/>(cm<sup>3</sup>/g)</b> |
|------------------------------------------------------------------------|-----------------------------------------------|---------------------------|-------------------------------------------|
| CdO <sub>x</sub> Cl <sub>y</sub> /Al <sub>2</sub> O <sub>3</sub> (1:1) | 42                                            | 14.5                      | 0.16                                      |
| CdO <sub>x</sub> Cl <sub>y</sub> /Al <sub>2</sub> O <sub>3</sub> (2:1) | 23                                            | 11.8                      | 0.09                                      |
| CdO <sub>x</sub> Cl <sub>y</sub> /Al <sub>2</sub> O <sub>3</sub> (3:1) | 19                                            | 10.4                      | 0.06                                      |
| CdCl <sub>2</sub>                                                      | 8                                             | 5.3                       | 0.02                                      |
| Al <sub>2</sub> O <sub>3</sub>                                         | 574                                           | 3.6                       | 0.48                                      |

# Figures

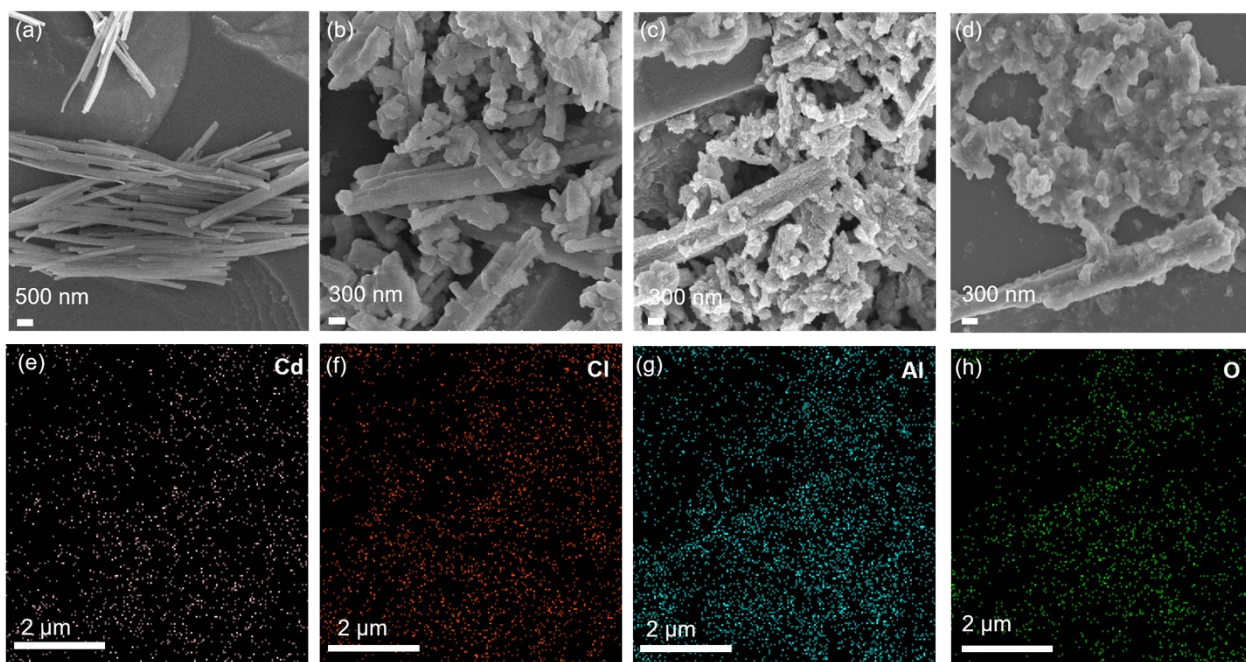

**Fig. S1** SEM images of Al<sub>2</sub>O<sub>3</sub> (a), CdO<sub>x</sub>Cl<sub>y</sub>/Al<sub>2</sub>O<sub>3</sub> (1:1) (b), CdO<sub>x</sub>Cl<sub>y</sub>/Al<sub>2</sub>O<sub>3</sub> (2:1) (c), CdO<sub>x</sub>Cl<sub>y</sub>/Al<sub>2</sub>O<sub>3</sub> (3:1) (d), and the EDS energy spectra of the CdO<sub>x</sub>Cl<sub>y</sub>/Al<sub>2</sub>O<sub>3</sub> (2:1) (e-h).

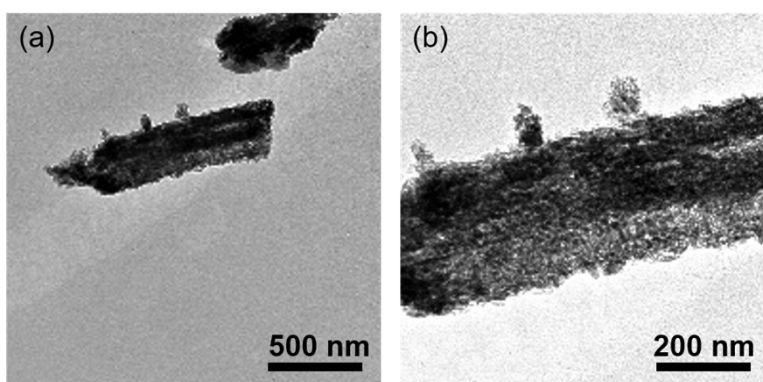

**Fig. S2** TEM images of CdO<sub>x</sub>Cl<sub>y</sub>/Al<sub>2</sub>O<sub>3</sub> (2:1).

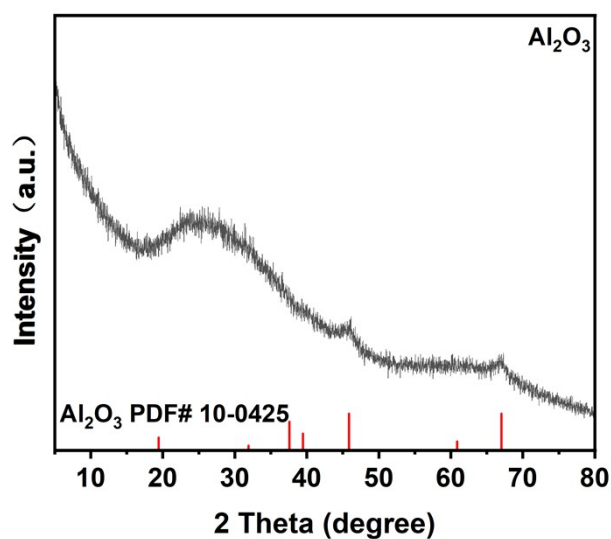

Fig. S3 XRD pattern of the  $\text{Al}_2\text{O}_3$ .

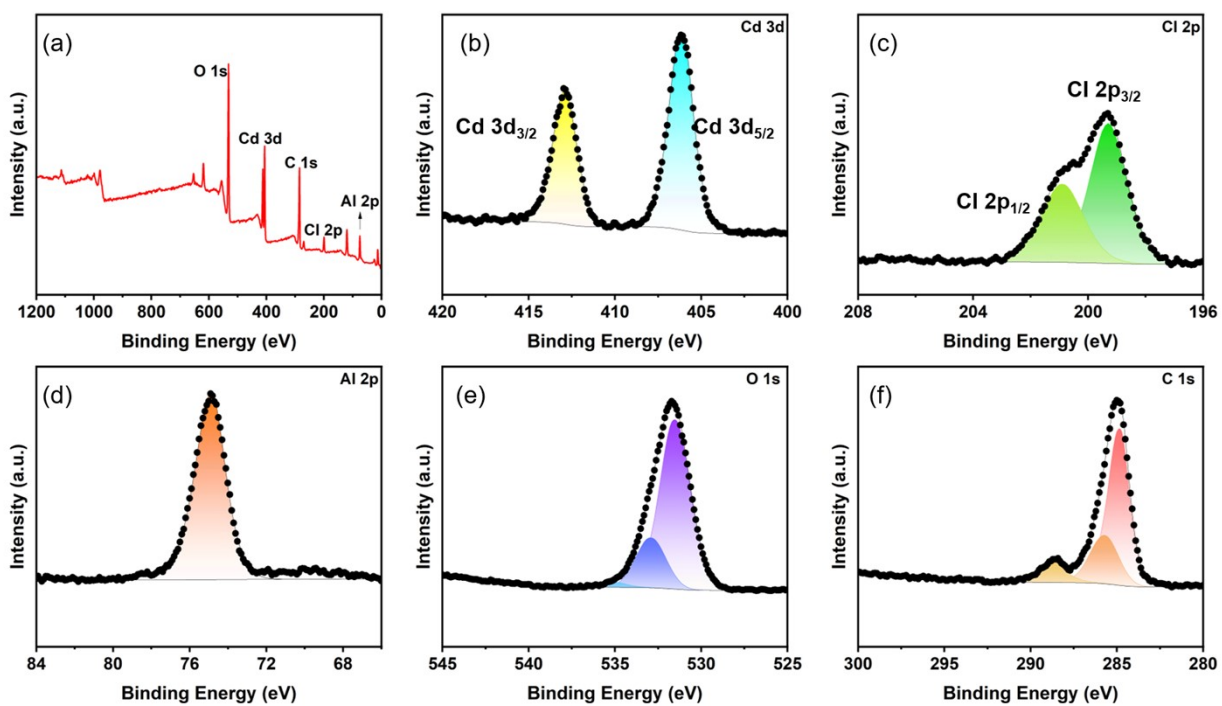

Fig. S4 XPS overall spectrum of the  $\text{CdO}_x\text{Cl}_y/\text{Al}_2\text{O}_3$  (2:1) catalyst (a), Cd 3d (b), Cl 2p (c), Al 2p (d), O 1s (e), and C 1s (f) of the  $\text{CdO}_x\text{Cl}_y/\text{Al}_2\text{O}_3$  (2:1).

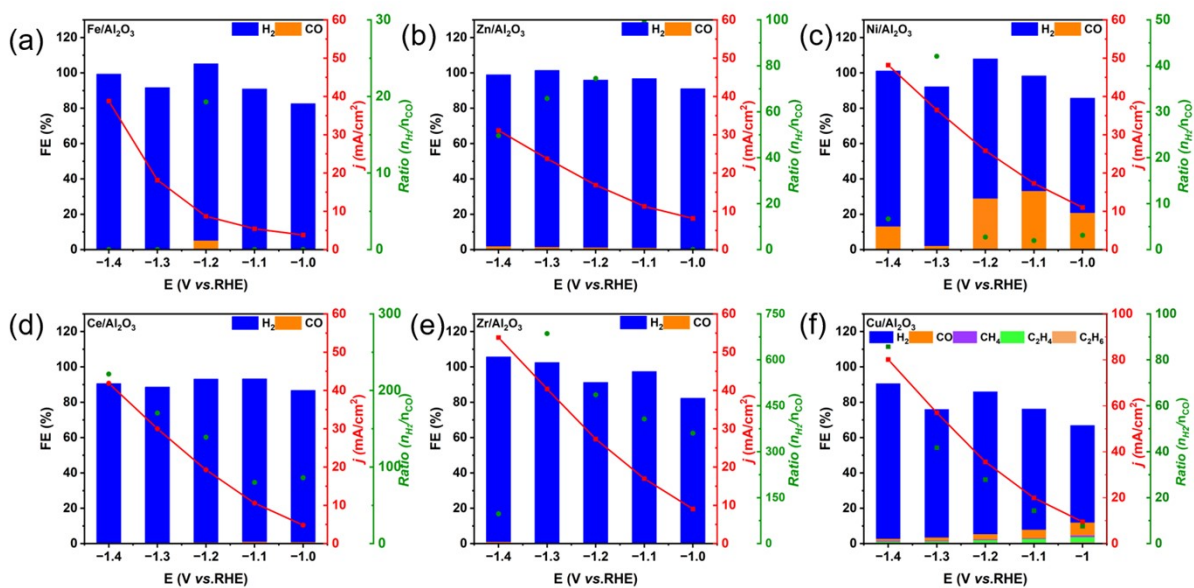

**Fig. S5** Catalytic performances of the eCO<sub>2</sub>RR over the Fe/Al<sub>2</sub>O<sub>3</sub> (a), Zn/Al<sub>2</sub>O<sub>3</sub> (b), Ni/Al<sub>2</sub>O<sub>3</sub> (c), Ce/Al<sub>2</sub>O<sub>3</sub> (d), Zr/Al<sub>2</sub>O<sub>3</sub> (e) and Cu/Al<sub>2</sub>O<sub>3</sub> catalyst (f).

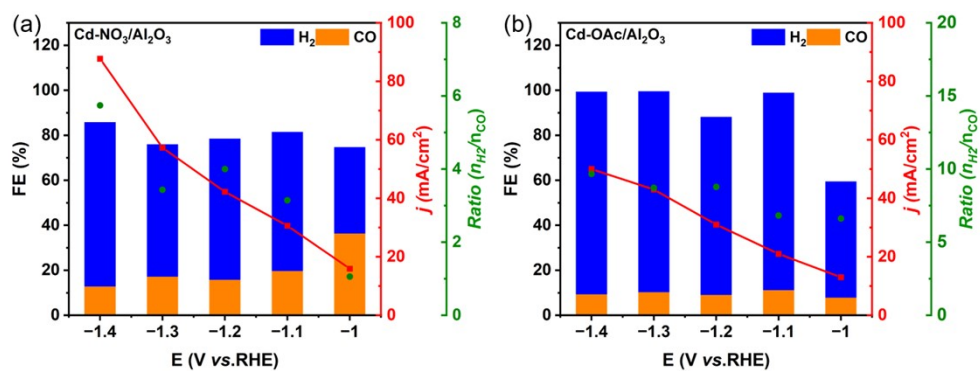

**Fig. S6** Catalytic performances of the eCO<sub>2</sub>RR over (a) the Cd-NO<sub>3</sub>/Al<sub>2</sub>O<sub>3</sub>, (b) the Cd-OAc/Al<sub>2</sub>O<sub>3</sub>.



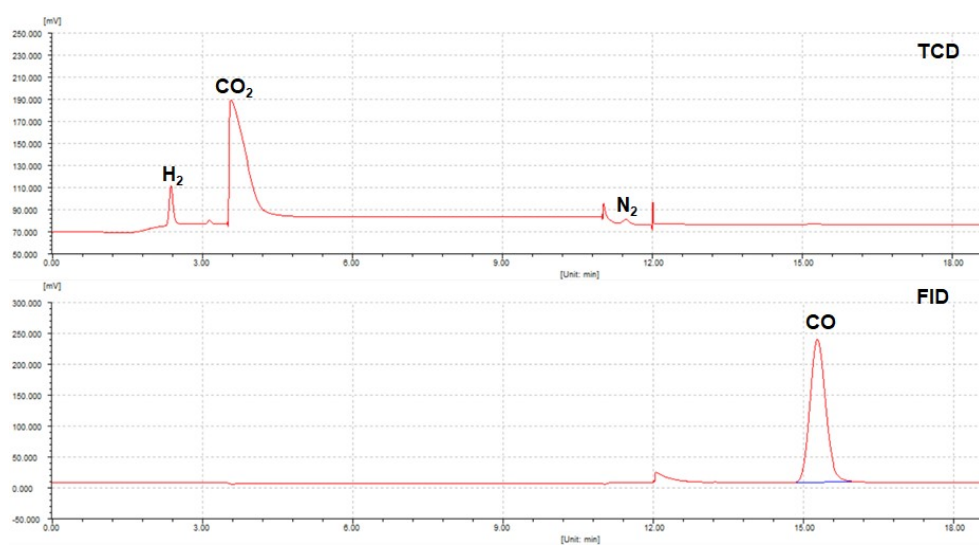

**Fig. S7** GC data of eCO<sub>2</sub>RR over the CdO<sub>x</sub>Cl<sub>y</sub>/Al<sub>2</sub>O<sub>3</sub> (2:1) catalyst.

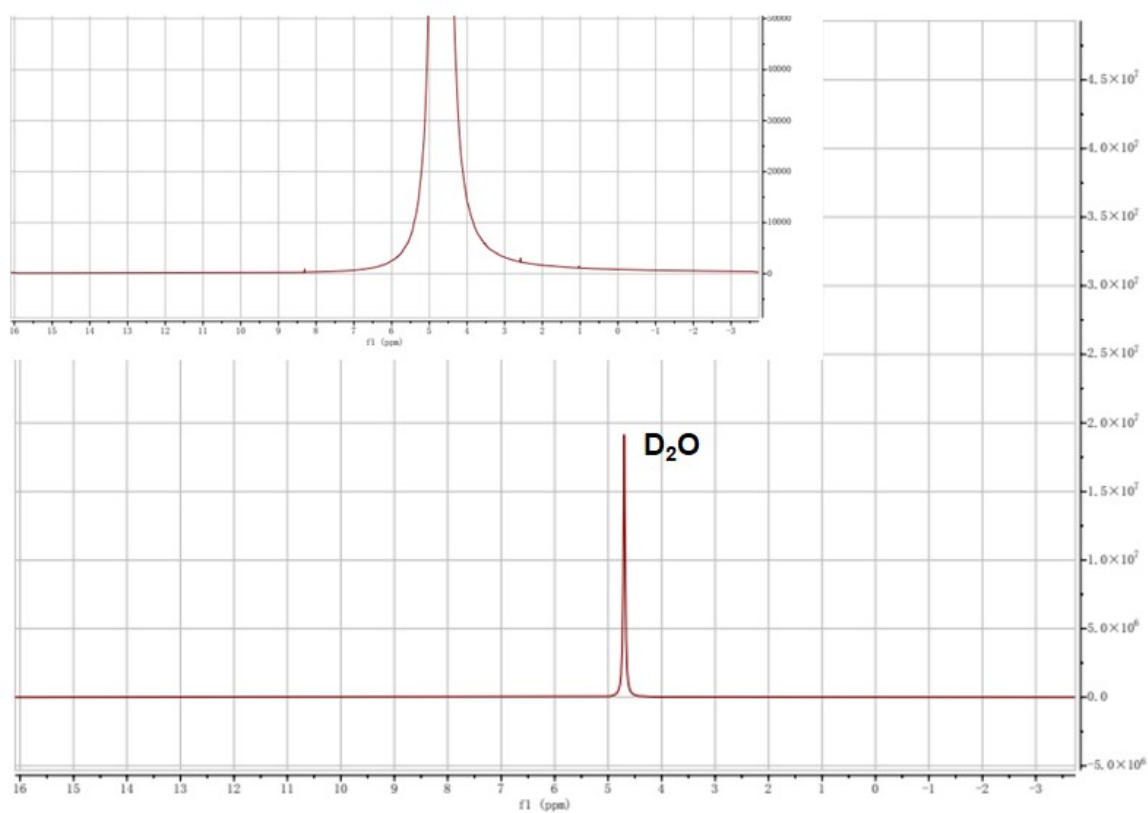

**Fig. S8** <sup>1</sup>H-NMR spectrum of the electrolyte obtained from eCO<sub>2</sub>RR over the CdO<sub>x</sub>Cl<sub>y</sub>/Al<sub>2</sub>O<sub>3</sub> (2:1) catalyst.

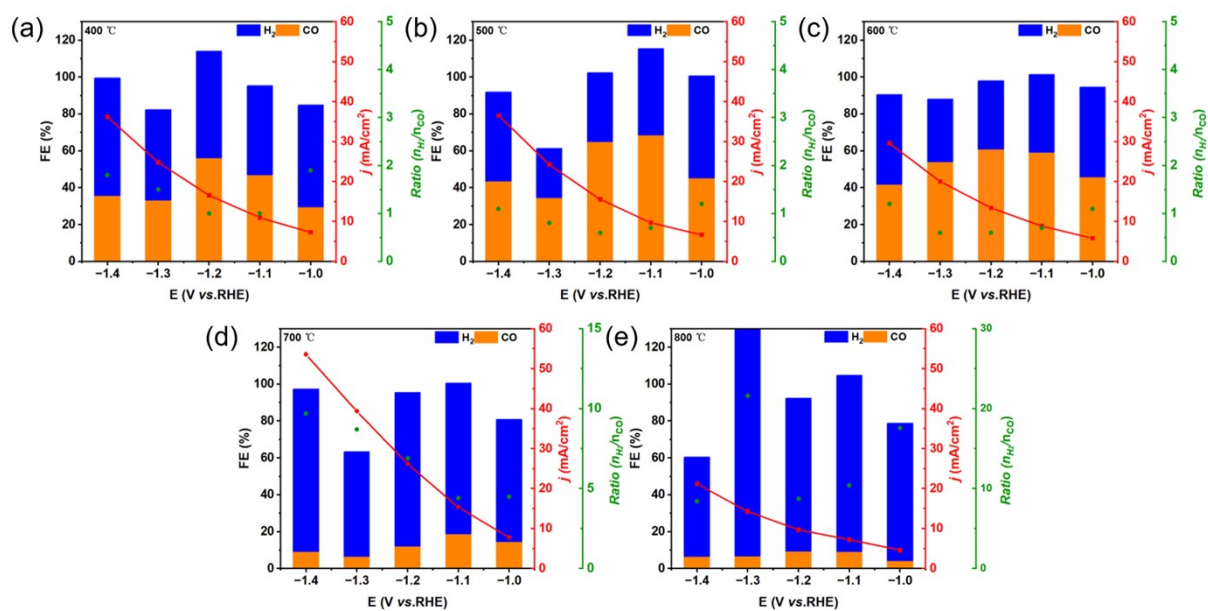

**Fig. S9** The effect of temperatures in preparation of catalyst on the catalytic performances over the  $\text{CdO}_x\text{Cl}_y/\text{Al}_2\text{O}_3$  (1:1).

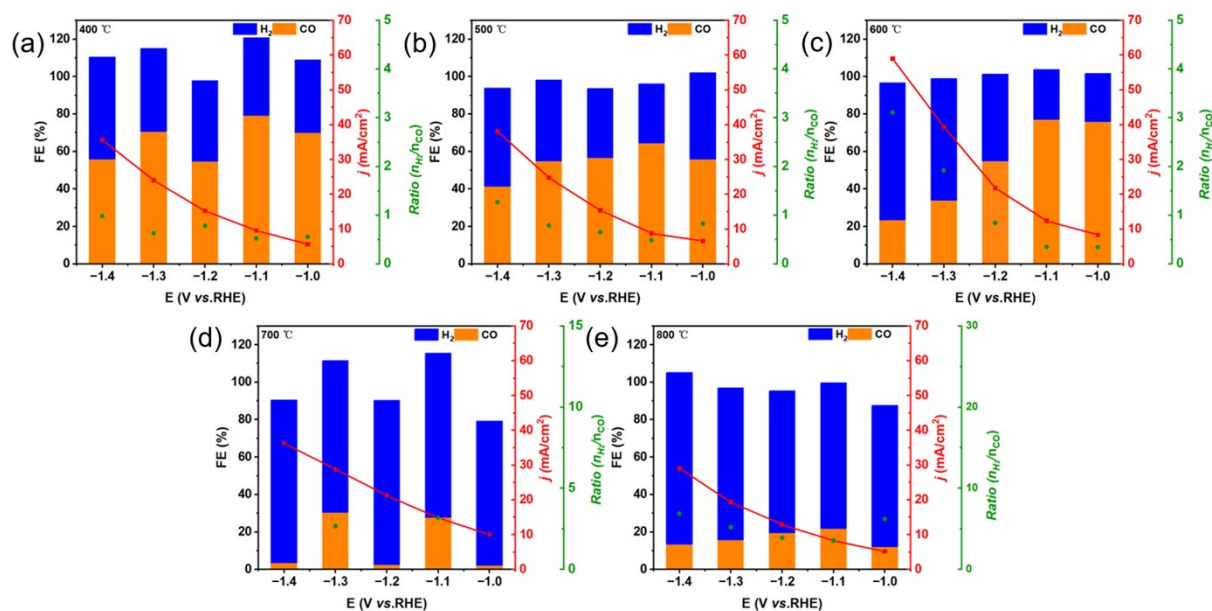

**Fig. S10** Effect of preparation temperatures of catalyst on the catalytic performances over the  $\text{CdO}_x\text{Cl}_y/\text{Al}_2\text{O}_3$  (2:1).

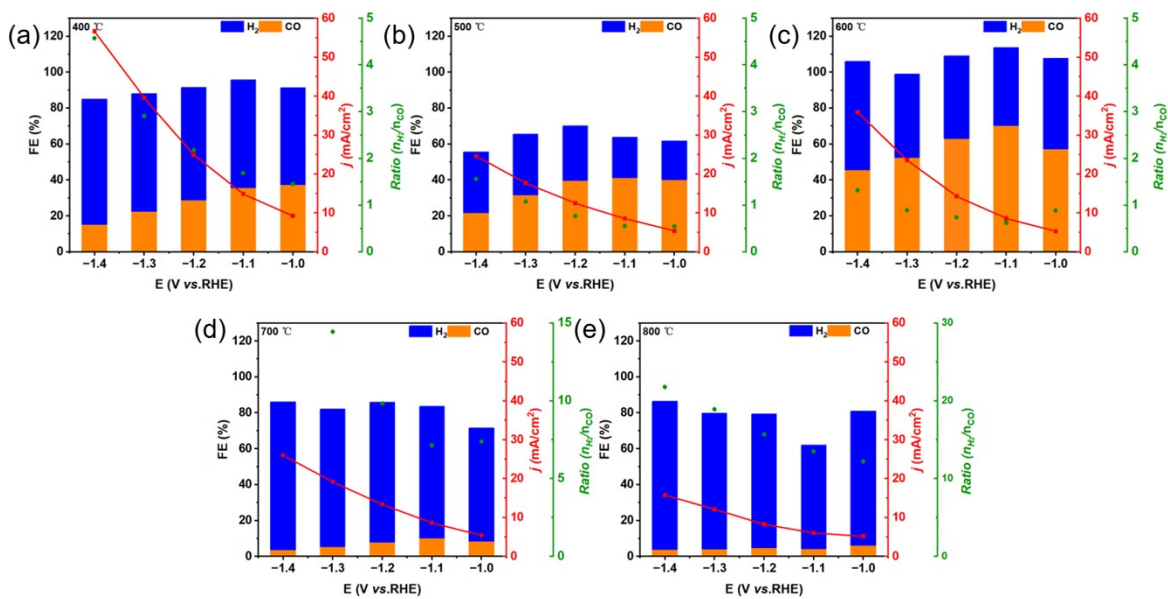

**Fig. S11** Effect of preparation temperatures of catalyst on the catalytic performances over the  $CdO_xCl_y/Al_2O_3$  (3:1) sample.

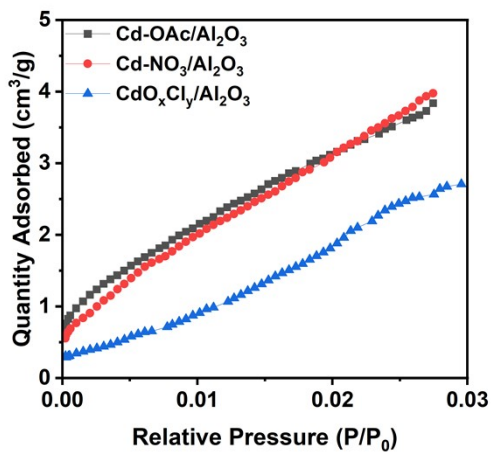

**Fig. S12** CO<sub>2</sub> adsorption behaviors for diverse catalysts.

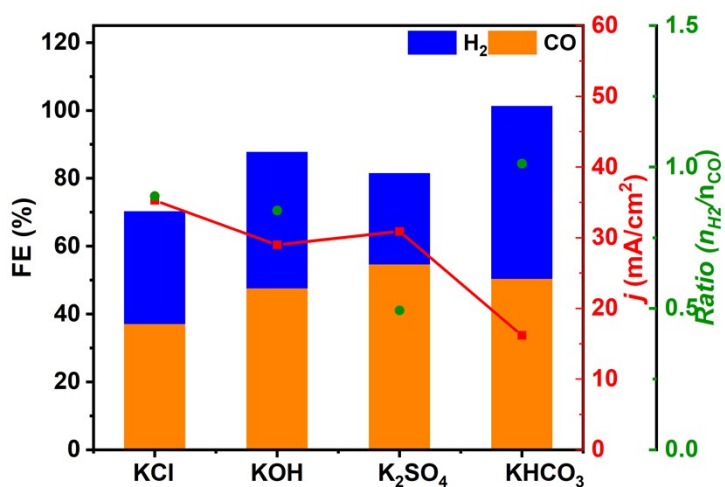

**Fig. S13** Catalytic performances of eCO<sub>2</sub>RR over the CdO<sub>x</sub>Cl<sub>y</sub>/Al<sub>2</sub>O<sub>3</sub> (2:1) catalyst in different electrolytes.

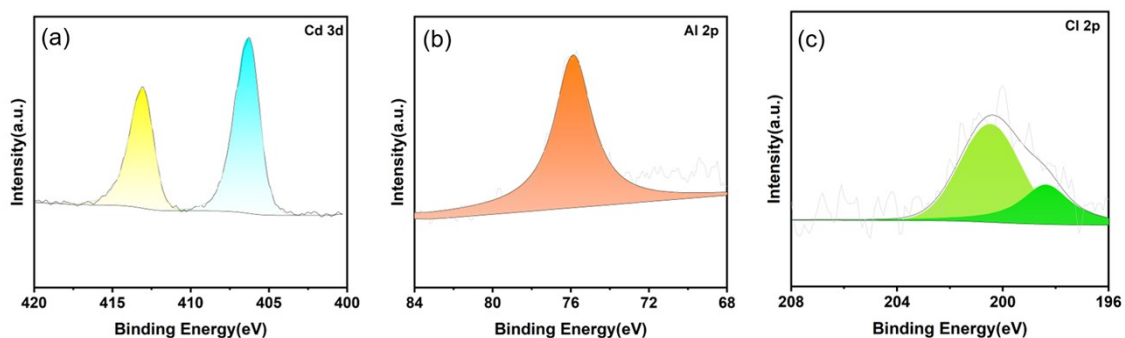

**Fig. S14** XPS spectra of Cd 3d (a), Al 2p (b), and Cl 2p (c) of the used CdO<sub>x</sub>Cl<sub>y</sub>/Al<sub>2</sub>O<sub>3</sub> (2:1) catalyst.

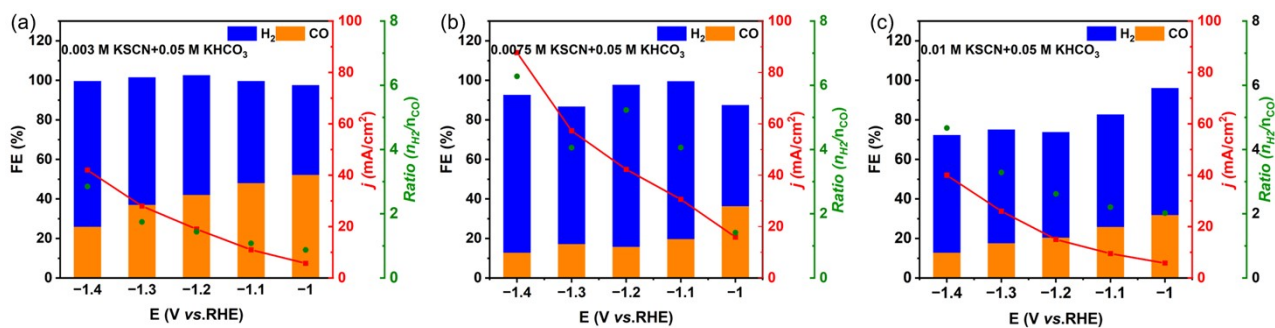

**Fig. S15** Catalytic performances of eCO<sub>2</sub>RR over CdO<sub>x</sub>Cl<sub>y</sub>/Al<sub>2</sub>O<sub>3</sub> poisoned by a (a) 0.003 M (b) 0.0075 M, (c) 0.01M KSCN solution. Other conditions were similar to those of **Fig. 6e**.

## References

1. K. Li, Y. Kuwahara and H. Yamashita. *Appl. Catal. B-Environ.*, 2023, **331**, 122713.
2. W.-Y. Yan, C. Zhang and L. Liu. *ACS Appl. Mater. Interfaces*, 2021, **13**, 45385-45393.
3. K. Cao, Y. Ji, S. Bai, X. Huang, Y. Li and Q. Shao. *J. Mater. Chem. A*, 2021, **9**, 18349-18355.
4. H. Li, J. Gao, Q. Du, J. Shan, Y. Zhang, S. Wu and Z. Wang. *Energy*, 2021, **216**, 119250.
5. B. Chang, X.-G. Zhang, Z. Min, W. Lu, Z. Li, J. Qiu, H. Wang, J. Fan and J. Wang. *J. Mater. Chem. A*, 2021, **9**, 17876-17884.
6. H. Luo, B. Li, J.-G. Ma and P. Cheng. *Angew. Chem. Int. Ed.*, 2022, **61**, e202116736.
7. X. Du, L. Peng, J. Hu, Y. Peng, A. Primo, D. Li, J. Albero, C. Hu and H. García. *Nanoscale*, 2022, **14**, 11583-11589.
8. H. He, D. Xia, X. Yu, J. Wu, Y. Wang, L. Wang, L. Wu, J. Huang, N. Zhao, L. Deng and Y.-N. Liu. *Appl. Catal. B-Environ.*, 2022, **312**, 121392.
9. C. Wang, X. Wang, H. Ren, Y. Zhang, X. Zhou, J. Wang, Q. Guan, Y. Liu and W. Li. *Nat. Commun.*, 2023, **14**, 5108.
10. P.-P. Guo, Z.-H. He, H.-H. Cao, K. Wang, W. Wang, Y. Tian, J. Liu, L. Li and Z.-T. Liu. *Appl. Catal. B-Environ.*, 2024, **347**, 123786.
11. W. Zhang, H. Li, D. Feng, C. Wu, C. Sun, B. Jia, X. Liu and T. Ma. *Carbon Energy*, 2024, **6**, e461.
12. K. Li, Y. Kuwahara, K. Chida, T. Yoshii, H. Nishihara and H. Yamashita. *Chem. Eng. J.*, 2024, **488**, 150952.
13. C. Chen, X. Yan, R. Wu, Y. Wu, Q. Zhu, M. Hou, Z. Zhang, H. Fan, J. Ma, Y. Huang, J. Ma, X. Sun, L. Lin, S. Liu and B. Han. *Chem. Sci.*, 2021, **12**, 11914-11920.
14. X. Jia, K. Qi, J. Yang, Z. Fan, Z. Hua, X. Wan, Y. Zhao, Y. Mao and D. Yang. *Chem. Eng. J.*, 2023, **29**, e202302613.
15. J. Yang, J. Yu, W. Dong, D. Yang, Z. Hua, X. Wan, M. Wang, H. Li and S. Lu. *Small*, 2023, **19**, 2301319.
